# Supplementary material for: Combining radar and direct observation to estimate pelican collision risk at a proposed wind farm on the Cape west coast, South Africa
Source: PLOS journal article supplement (doi:10.1371/journal.pone.0192515), 2018-02-06
Supplement: S4 (10.1371/journal.pone.0192515.s004) [file journal.pone.0192515.s004]

| Parameter                                                | Value(s) used                                              | Data and source                                                                                                                                                                                                                         |
|----------------------------------------------------------|------------------------------------------------------------|-----------------------------------------------------------------------------------------------------------------------------------------------------------------------------------------------------------------------------------------|
| <b>Female population size</b>                            | Approximately 1150 females                                 | Monogamous so assume equal sex ratio [48]; up to 516 nests on Dassen 2013, therefore 1032 breeding adults (Van Onselen, Unpubl. Data); <i>ca</i> 45% of adults breed annually [22], therefore total = about 2300 adults or 1150 females |
| <b>Maximum age</b>                                       | 30                                                         | 28 and 36 yr in Walvis Bay, 39 yrs in Eastern Cape [22]; at least 26, perhaps >28 yr [48]                                                                                                                                               |
| <b>Maximum breeding age</b>                              | 30                                                         | No data                                                                                                                                                                                                                                 |
| <b>% population breeding</b>                             | 34%, 46%, 57%                                              | 34-57% [22]; highly variable [48]                                                                                                                                                                                                       |
| <b>Broods</b>                                            | 1-3 eggs, usually 2. Can lay replacement clutch after loss | [22, 47, 48]                                                                                                                                                                                                                            |
| <b>Age of first breeding</b>                             | 3                                                          | [22]                                                                                                                                                                                                                                    |
| <b>Sex ratio of eggs laid</b>                            | 50:50                                                      | No data, assume equal                                                                                                                                                                                                                   |
| <b>Female chicks reared per female in the population</b> | 0.02, 0.06, 0.12 (chicks x proportion breeding)            | Obligate siblicide, so between 0.12-0.42 chicks raised.pair <sup>-1</sup> . year <sup>-1</sup> [22]                                                                                                                                     |
| <b>% first year mortality</b>                            | 26%                                                        | [22]                                                                                                                                                                                                                                    |
| <b>% adult mortality</b>                                 | 4%                                                         | [22]                                                                                                                                                                                                                                    |
